# Supplementary material for: Hydrogen peroxide induced loss of heterozygosity correlates with replicative lifespan and mitotic asymmetry in Saccharomyces cerevisiae
Source: PeerJ. 2016 Nov 3;4:e2671. doi: 10.7717/peerj.2671 (PMC5101604; doi:10.7717/peerj.2671)
Supplement: Supplemental Information 1 [file peerj-04-2671-s001.xlsx]

## Sheet: LOHH2O2_dataset.csv
Summarized estimates for H2O2-induced LOH study
strains	Cv	CvSTD	Cb	CbSTD	bmin	bmax	Cv/Cb	Cv/Cb STD	Cb/Cv	Cb/Cv STD	Cb0.5	Cb.05STD	b0.5min	b0.5max
101S	0.0398931	0.00410886	0.0318547	0.00262291	0.00444232	0.0347538	1.45306	0.0373997	0.688201	0.148781	0.0318547	0.00262291	0.00671697	0.0222765
BY4743	0.0417755	0.0107815	0.018443	0.0119403	0.0177412	0.0481927	0.670845	0.017239	1.49066	0.177803	0.004552	0.00770463	0.0105503	0.0254697
M1-2	0.0466447	0.011436	0.0296915	0.0128852	0.002869	0.0418937	2.16098	0.681884	0.462753	0.147034	0.0334524	0.00653462	0.00437972	0.0373663
M13	0.0206448	0.0130864	0.021839	0.0164762	0.00792502	0.0703965	2.18436	1.61428	0.4578	0.649276	0.0507535	0.0629106	0.0125365	0.044055
M2-8	0.0415032	0.0166831	0.0783333	0.0453689	0.0107408	0.024845	0.8897	0.984493	1.12397	1.72147	0.0461943	0.0337596	0.00805983	0.0362401
M32	0.150639	0.0564454	0.156232	0.0609863	0.0071541	0.0362205	3.70399	3.45975	0.269979	0.0628382	0.137685	0.0487861	0.0120004	0.0363261
M34	0.0947571	0.0303835	0.0616363	0.0164563	0.00544906	0.038319	1.99179	1.29294	0.502062	0.402952	0.0382008	0.0166866	0.0069221	0.0473944
M5	0.0637924	0.0197848	0.0609012	0.015696	0.00347145	0.0582216	0.789168	0.411738	1.26716	0.0525666	0.0399663	0.0139104	0.00233658	0.0384483
M8	0.061459	0.0204661	0.0502646	0.00960588	0.00371221	0.0414648	2.16368	1.71922	0.462176	0.215932	0.0417056	0.017856	0.00845445	0.0352342
SGU57	0.0184249	0.00983678	0.0442502	0.021862	0.0058495	0.0438501	2.37501	0.57797	0.42105	1.92387	0.0431426	0.00455064	0.00355998	0.015941
YPS128	0.00829025	0.00318175	0.0154987	0.00874146	0.0903282	0.156698	0.452873	0.131589	2.20813	0.842453	0.0459858	0.0635772	0.00826396	0.0376163
YPS163	0.0138856	0.00117319	0.0222462	0.0185323	0.0053579	0.0961336	0.573886	0.403463	1.74251	1.2434	0.0131611	0.0070068	0.0110899	0.0471776
Note
STD indicates standard deviation
