# Supplementary material for: Hydrogen peroxide induced loss of heterozygosity correlates with replicative lifespan and mitotic asymmetry in Saccharomyces cerevisiae
Source: PeerJ. 2016 Nov 3;4:e2671. doi: 10.7717/peerj.2671 (PMC5101604; doi:10.7717/peerj.2671)
Supplement: Supplemental Information 2 [file peerj-04-2671-s002.xlsx]

## Sheet: Sheet1
Testing results on the occurrence of 3/4 black colonies.
In each experiemnt, Fisher's exact test were applied to every H2O2 concentration with sufficient 1/2, 1/4, and 3/4 LOH events.
Bonferronie correction were applied to adjust for signiciant andn nonsigficant tests.
DataFile	Significant H2O2 concentrations	Nonsignificant H2O2 concentrations
101S.PeroxideEffectonLOH.Jan252011.csv	5	0
101S.PeroxideEffectonLOH.Jan272011.csv	7	0
BY4743,20120530,H2O2LOH.csv	6	0
BY4743,20120907,H2O2LOH.csv	6	0
M1-2,20110422.H2O2onLOH.csv	7	1
M1-2,20111207.modified.csv	1	0
M1-2,20120502,H2O2LOH.csv	8	0
M13,08242011.H2O2.LOH.csv	9	0
M13,Dec2,2011.modified.csv	2	0
M13,May18.2011.M13.H2O2.LOH.csv	6	1
M2-8,06062011.H2O2onLOH.csv	4	1
M2-8,08172011.H2O2.LOH.modified.csv	6	1
M2-8,Dec19 2011.csv	2	0
M32,08102011.H2O2onLOH.csv	6	1
M32,Jan10,2012,OneandHalfHour.modified.csv	1	0
M32,Jan10,2012,Three Hours.corrected.csv	5	0
M32,Jan4,2012.csv	4	0
M32,May25,2011.H202LOHcorrected.csv	4	3
M34,042011.H2O2onLOH.csv	5	4
M34.08232011.H2O2.LOH.csv	8	1
M5,08162011.H2O2.LOH.csv	7	2
M5,H202.022511.csv	5	2
M8,Dec15 2011.csv	6	0
M8,Feb8,2011.H2O2effectonLOHmodified.csv	8	1
M8,Mar302011.Effectof H2O2onLOH.csv	6	2
SGU57,Jan12,2012.modified.csv	0	0
SGU57,Jan13,2012.modified.csv	0	0
SGU57,Jan6,2012.csv	0	0
YPS128,042911,H2O2LOH.modified.csv	2	0
YPS128,20110825,H2O2LOH.csv	3	1
YPS128,DEC9,2011.csv	1	0
YPS128,H2O2LOH_Nov14,2011.modified.csv	0	0
YPS163,20120503,YPS163-H2O2LOH.csv	9	0
YPS163,Apr082011.H2O2onLOH.modifed.csv	4	1
YPS163,Apr13,2011.H2O2.LOH.csv	10	0
Total	163	22
